# Supplementary material for: Delivery of pancreatic digestive enzymes into the gastrointestinal tract by pancreatic exocrine tissue transplant
Source: PubMed Central journal article supplement (PMC6459827; doi:10.1038/s41598-019-42362-z), 2019-04-11
Supplement: 41598_2019_42362_MOESM1_ESM.pdf [file 41598_2019_42362_MOESM1_ESM.pdf]

1 **Title: Delivery of pancreatic digestive enzymes into the**  
2 **gastrointestinal tract by pancreatic exocrine tissue transplant**

3 **Short title:** Pancreatic exocrine tissue transplant

4

5 Kyoji Ito<sup>1,2</sup>, Katsuhisa Matsuura<sup>1\*</sup>, Yuichiro Mihara<sup>1,2</sup>, Yoshihiro

6 Sakamoto<sup>2</sup>, Kiyoshi Hasegawa<sup>2</sup>, Norihiro Kokudo<sup>2</sup> and Tatsuya Shimizu<sup>1</sup>

7

8 <sup>1</sup>Institute of Advanced Biomedical Engineering and Science, Tokyo

9 Women's Medical University, Tokyo, Japan

10 <sup>2</sup>Hepato-Biliary-Pancreatic Surgery Division, Department of Surgery,

11 Graduate School of Medicine, The University of Tokyo, Tokyo, Japan

12

13 **\*Correspondence to:** Katsuhisa Matsuura, Institute of Advanced

14 Biomedical Engineering and Science, Tokyo Women's Medical University,

15 8-1 Kawada-cho, Shinjuku-ku, Tokyo, 162-8666, Japan.

16 Tel: +81-3-5367-9945; Fax: +81-3-3359-6046

1 E-mail: [matsuura.katsuhisa@twmu.ac.jp](mailto:matsuura.katsuhisa@twmu.ac.jp)

2

3 SREP-18-25817-T-R1

4

**Supplementary Table 1.** List of primers used for Applied Biosystems PCR assay.

| Gene   | Applied Biosystems TaqMan assay ID |
|--------|------------------------------------|
| PDX1   | Hs00236830_m1                      |
| NKX6-1 | Hs00232355_m1                      |
| PTF1A  | Hs00603586_g1                      |
| SOX9   | Hs00165814_m1                      |
| AMY2A  | Hs00420710_g1                      |
| PRSS58 | Hs00976361_m1                      |
| KRT19  | Hs00761767_s1                      |
| GAPDH  | Hs00266705_g1                      |

**Supplementary Table 2.** Antibodies applied for flow cytometry and immunostaining (of cells and organoid cryo/paraffin sections).

| Antigen                  | Species | Cat. No.  | Company             | Dilution |
|--------------------------|---------|-----------|---------------------|----------|
| PDX1                     | Goat    | AF2419    | R&D Systems         | 200: 1   |
| NKX6.1                   | Rabbit  | HPA036774 | Atlas Antibodies    | 100: 1   |
| PTF1A                    | Mouse   | ab57257   | Abcam               | 300: 1   |
| SOX9                     | Rabbit  | AB5535    | EMD Millipore       | 100: 1   |
| CK19                     | Mouse   | M0888     | Dako                | 200: 1   |
| MUC1                     | Rabbit  | ab45167   | Abcam               | 500: 1   |
| Pancreatic alpha amylase | Rabbit  | ab21156   | Abcam               | 400: 1   |
| Trypsin                  | Sheep   | AF3848    | R&D Systems         | 200: 1   |
| Glucagon                 | Mouse   | MAB8497   | R&D Systems         | 100: 1   |
| C-peptide                | Rabbit  | GTX124265 | GENETEX             | 100: 1   |
| Albumin                  | Goat    | A80-129A  | Bethyl Laboratories | 200: 1   |
| Human mitochondria       | Mouse   | MAB1273   | EMD Millipore       | 50: 1    |

# Supplementary Figure 1

**a**

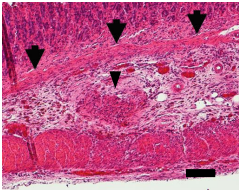

**b**

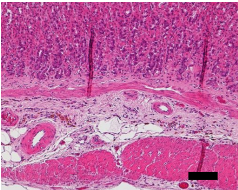

# Supplementary Figure 2

**a**

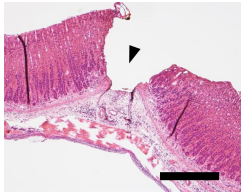

**b**

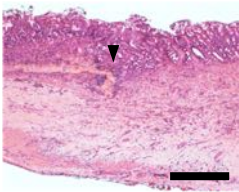

# Supplementary Figure 3

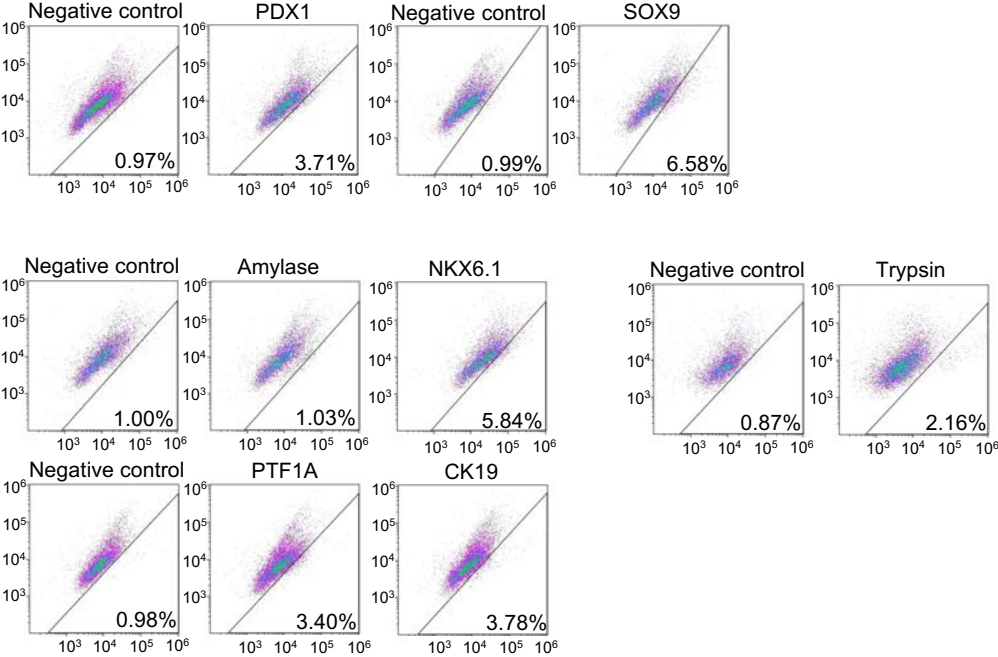

# Supplementary Figure 4

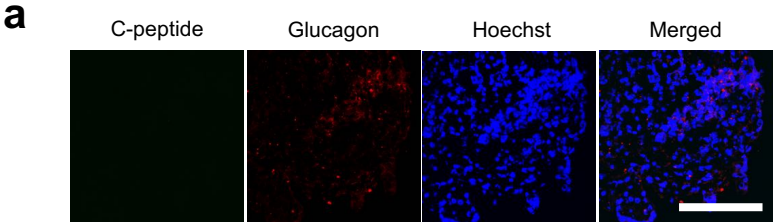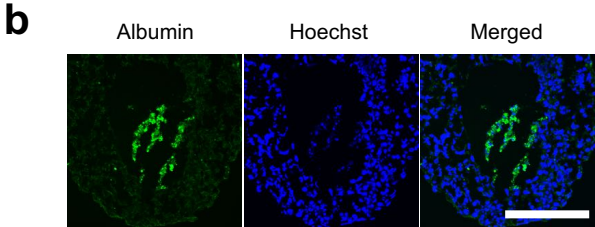



# Supplementary Figure 5

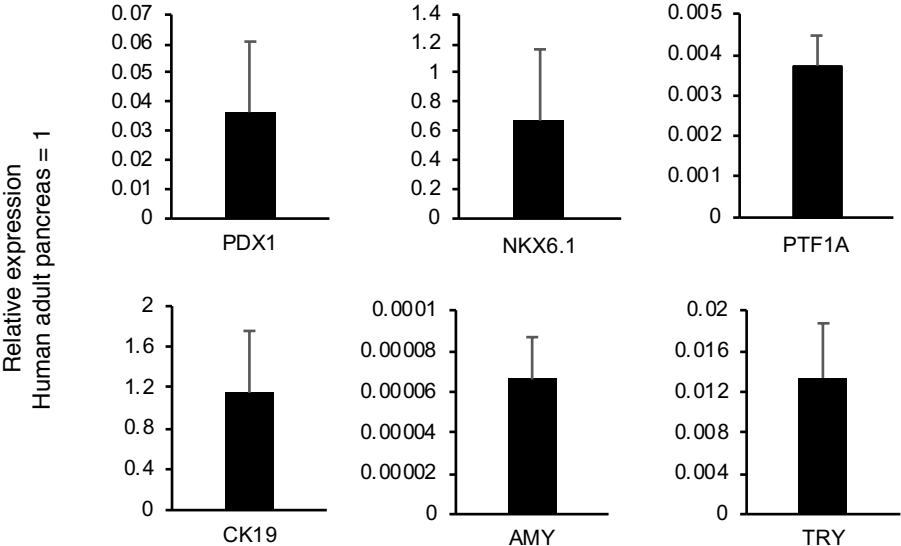

# Supplementary Figure 6

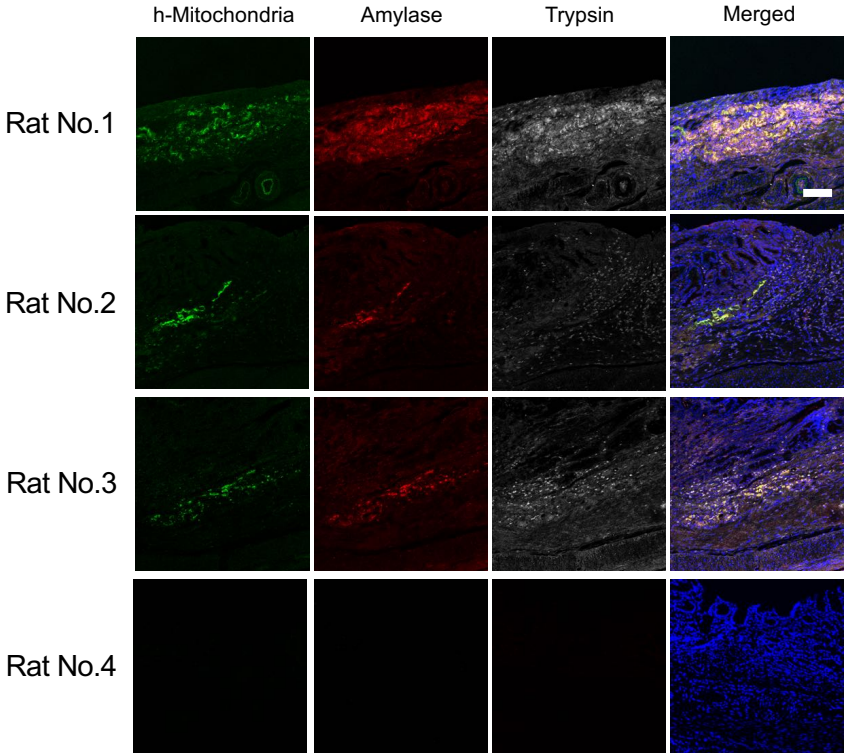

1 **Supplementary Figure 1.** Allogenic transplantation of minced rat pancreas into the  
2 gastric submucosal space. **(a)** Haematoxylin-eosin staining of the transplanted pancreas  
3 7 days after transplantation. The transplanted pancreas was observed in the submucosal  
4 space of the stomach (arrowhead). Muscularis mucosa interfered with the contact of the  
5 transplanted pancreas to the gastric lumen (arrow). Fat necrosis was observed around  
6 the transplanted cells. **(b)** Haematoxylin-eosin staining of the transplantation site 21  
7 days after transplantation. The transplanted pancreas vanished, and fat necrosis with  
8 saponification and surrounding fibrosis resulting from inflammatory reaction were  
9 observed, suggesting the auto-digestion of the transplanted pancreas. Scale bar: 500  $\mu\text{m}$ .

10

11 **Supplementary Figure 2.** Evaluation of muscularis mucosa in gastric ulcer. **(a)**  
12 Haematoxylin-eosin staining of the gastric wall 3 days after the development of gastric  
13 ulcer by electrocautery. Both mucosa and muscularis mucosa were damaged by the  
14 gastric ulcer (arrowhead). **(b)** Haematoxylin-eosin staining of the gastric wall after  
15 healing of the gastric ulcer. The regeneration occurred only in the mucosal layer, and  
16 muscularis mucosa was disrupted after recovery of the gastric ulcer (arrowhead). Scale

1 bar: 500  $\mu$ m.

2

3 **Supplementary Figure 3.** Representative dot plots from flow cytometry analysis at day

4 2.

5

6 **Supplementary Figure 4.** Immunofluorescence staining of cell aggregates at the end of

7 stage 5 for (a) C-peptide (green) and glucagon (red) and (b) albumin (green). Nuclei

8 were stained with Hoechst 33258 (blue). Scale bar: 100  $\mu$ m.

9

10 **Supplementary Figure 5.** Comparison of mRNA expression of pancreatic markers

11 between the adult pancreas and iPSC-derived pancreatic exocrine cells (n = 3). The

12 levels of acinar markers in iPSC-derived pancreatic exocrine cells were lower than

13 those in the adult pancreas.

14

15 **Supplementary Figure 6.** Immunofluorescence staining of the implantation site of all

16 four rats. Human mitochondria (green), amylase (red), and trypsin (white). Nuclei were

- 1 stained with Hoechst 33258 (blue). The implanted cells were observed in Rat No. 1 and
- 2 3, a few implanted cells were observed in Rat No. 2 and no implanted cells were
- 3 observed in Rat No. 4. Scale bar, 100  $\mu\text{m}$ .
- 4
